# Supplementary material
Source: Springer Nature journal article supplement (https://www.springermedizin.de/resource/supplementary/12913_2007_719_MOESM1_ESM.pdf/9535390)

### Lower-Cost ICS Users in 2003 (n=1,140)

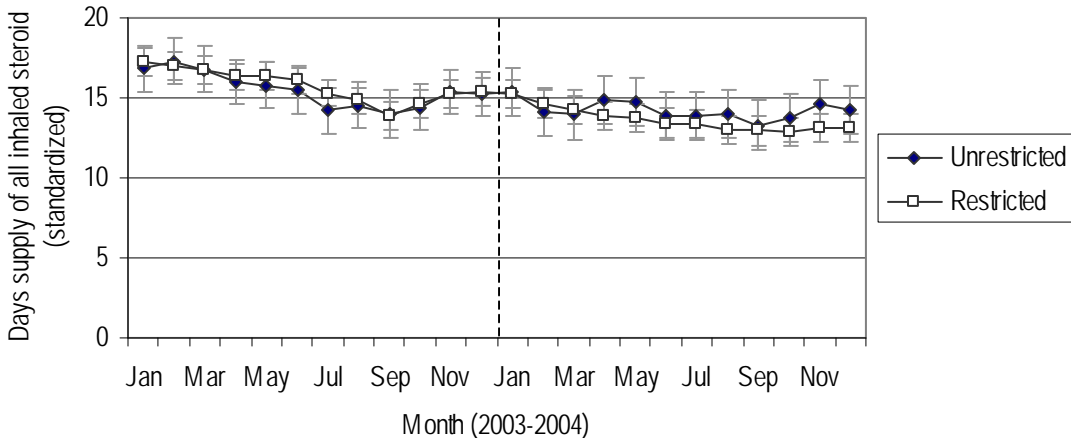

### Higher-Cost ICS Users in 2003 (n=662)

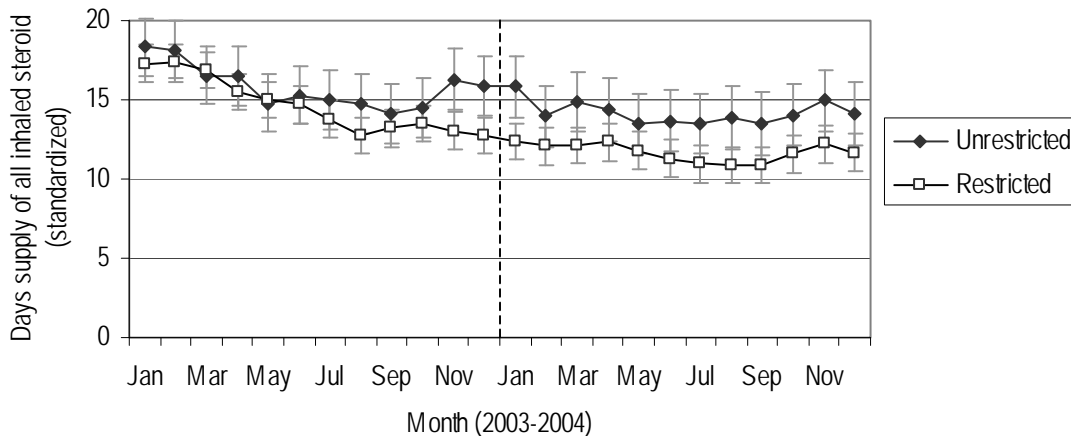

Supplement: MOESM1 [file 9535390]
